# Supplementary material
Source: HighWire-hosted journal article supplement (https://bmjopen.bmj.com/content/9/10/e031151)
Supplement: inline-supplementary-material-3 [file inline-supplementary-material-3.pdf]

**Supplement 3, Table.** Significant sociodemographic findings preference vs randomised cohorts

| Preference cohorts in comparison to randomised cohorts |                                            |                    |
|--------------------------------------------------------|--------------------------------------------|--------------------|
| <i>Sociodemographic differences</i>                    |                                            |                    |
| <b>Age</b>                                             | Older[17,27,41,44,52,60]                   | 6/34 trials tested |
|                                                        | Younger[46,50]                             | 2/34               |
| <b>Gender</b>                                          | Female[35,50]                              | 2/24 trials tested |
|                                                        | Male[67]                                   | 1/24               |
| <b>Education</b>                                       | Higher[17,46,51,61]                        | 4/19 trials tested |
|                                                        | Lower                                      | 0/19               |
| <b>Employment</b>                                      | Yes[14,18,26]                              | 3/13 trials tested |
|                                                        | No[52]                                     | 1/13 trials tested |
| <b>Race</b>                                            | Caucasian[14,17,54,56]                     | 4/14 trials tested |
|                                                        | Non-Caucasian[23]                          | 1/14               |
| <b>Obese</b>                                           | Yes                                        | 0/7 trials tested  |
|                                                        | No[13,41,43,46]                            | 4/7                |
| <b>Smoking</b>                                         | Yes                                        | 0/5 trials tested  |
|                                                        | No[13,46]                                  | 2/5                |
| <b>Married</b>                                         | Yes                                        | 0/9 trials tested  |
|                                                        | No[51]                                     | 1/9                |
| <b>Experienced</b>                                     | Yes[27,52,65]                              | 3/9 trials tested  |
|                                                        | No[26]                                     | 1/9                |
| <i>Clinical differences</i>                            |                                            |                    |
| <b>Clinical problems</b>                               | More severe[13,21,23,26,37,54,60]          | 7/20 trials tested |
|                                                        | Less severe[14,16,25,32,41,50,51,56,57,61] | 10/20              |
|                                                        | Not consistent[40,43,67]                   | 3/20               |
